# Supplementary material for: Low pressure UV-cured CS–PEO–PTEGDMA/PAN thin film nanofibrous composite nanofiltration membranes for anionic dye separation
Source: Royal Society of Chemistry journal article supplement (doi:10.1039/c6ta04360g), 2016-01-01
Supplement: c6ta04360g1.pdf [file c6ta04360g1.pdf]

Supplementary information for

Low pressure UV-cured  
CS-PEO-PTEGDMA/PAN thin film nanofibrous  
composite nanofiltration membranes for anionic  
dyes separation

*By Lingdi Shen<sup>a</sup>, Cheng Cheng<sup>a</sup>, Xufeng Yu<sup>a</sup>, Yin Yang<sup>a</sup>, Xuefen Wang<sup>a\*</sup>, Meifang Zhu<sup>a</sup>,  
Benjamin S. Hsiao<sup>b</sup>*

<sup>a</sup>State Key Lab for Modification of Chemical Fibers and Polymer Materials, College of  
Material Science and Engineering, Donghua University, Shanghai, 201620, P.R. China

<sup>b</sup>Department of Chemistry, Stony Brook University, Stony Brook, New York 11794, USA

\*Corresponding author: [wangxf@dhu.edu.cn](mailto:wangxf@dhu.edu.cn)

## 1. The optimization of CS-PEO-PTEGDMA TFNC membranes

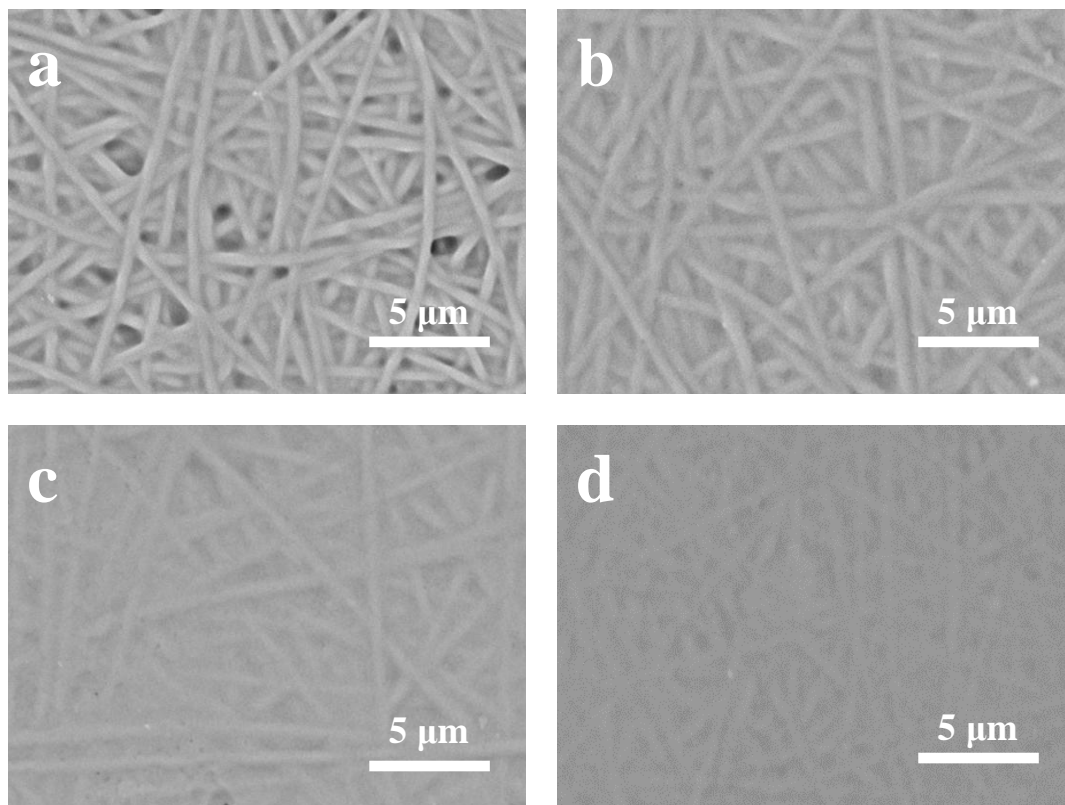

**Fig. S1.** The surface SEM images of CS-PEO-TEGDMA/PAN TFNC membranes with different depositing time of CS-PEO-TEGDMA nanobeads (a: 27 min; b: 30 min; c: 33 min; d: 36 min; acidic moistcuring time of 60 s, heating temperature of 50 °C and curing time of 4 min)

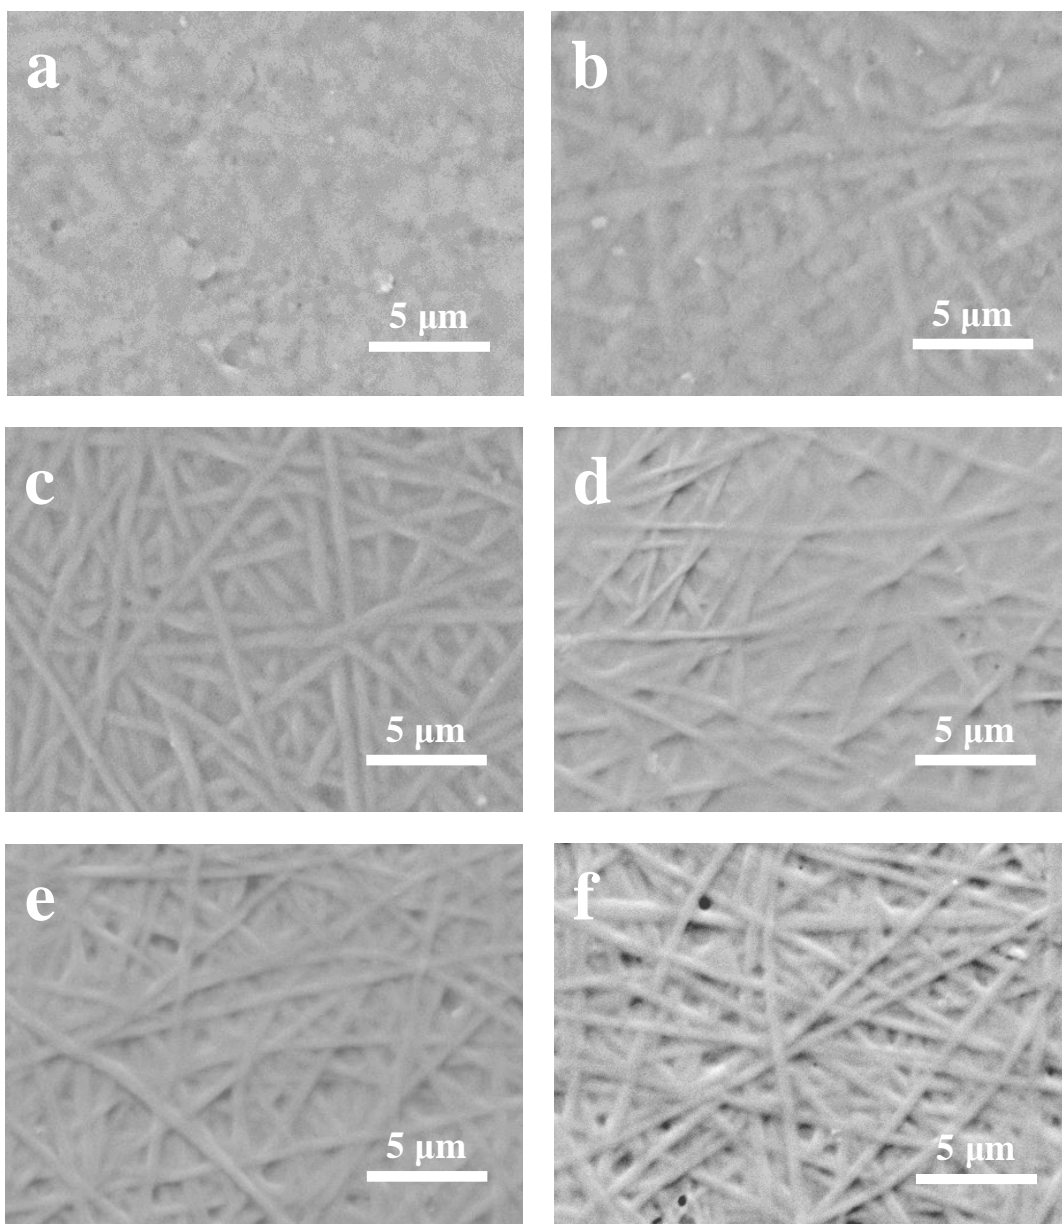

**Fig. S2.** The surface SEM images of CS-PEO-TEGDMA/PAN TFNC membranes with different heating temperatures in hot pressing treatment (a: 30 °C; b: 40 °C; c: 50 °C; d: 60 °C; e: 70 °C; f: 80 °C; acidic moistcuring time of 60 s, curing time of 4 min and deposition time of 30 min)

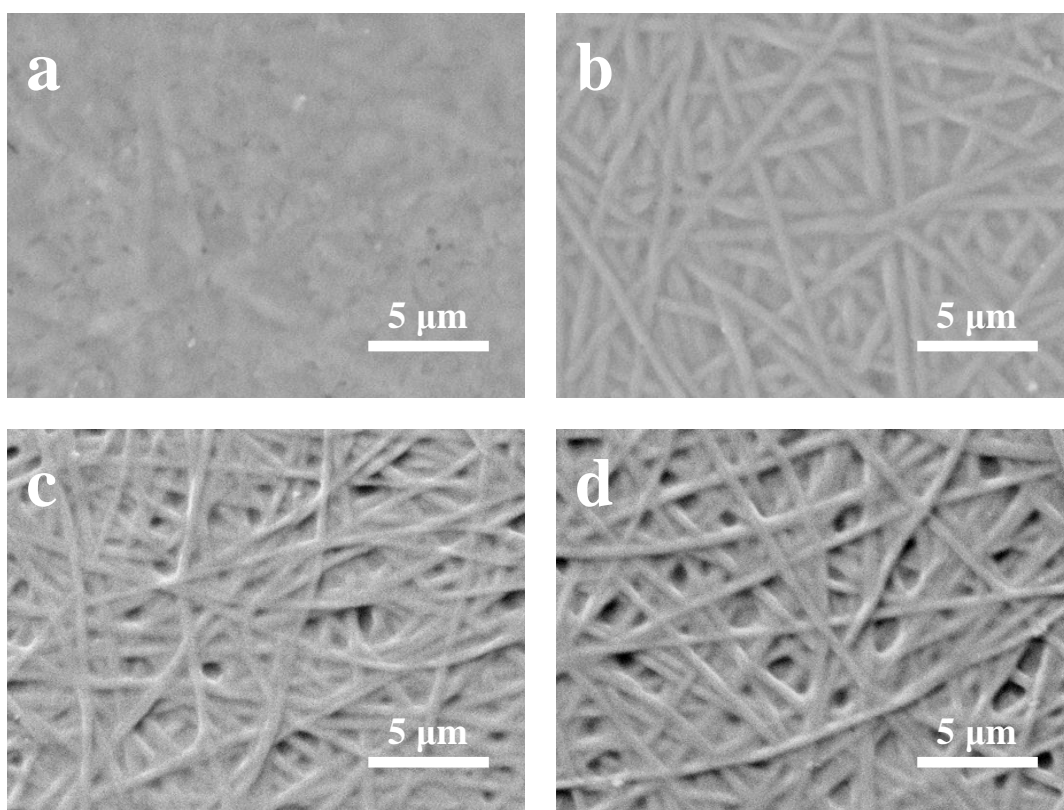

**Fig. S3.** The surface SEM images of CS-PEO-TEGDMA/PAN TFNC membranes with different curing time in hot pressing treatment (a: 2 min; b: 4 min; c: 6 min; d: 8 min; acidic moistcuring time of 60 s, heating temperature of 50 °C and deposition time of 30 min).

## 2. The ATR-FTIR spectra of CS-PEO-PTEGDMA composite membranes

FT-IR Fourier transform infrared (FT-IR) spectra were recorded on a Nicolet 8700 FT-IR spectrometer (USA) with the resolution of  $4\text{cm}^{-1}$  at spectral the range of  $4000\text{-}600\text{cm}^{-1}$  with ATR method to characterize surface chemical compositions of the CS-PEO-PTEGDMA composite membranes with different CS/TEGDMA mass ratios as shown in Fig. S4.

For the virgin CS/PEO spectrum in absence of PTEGDMA (1:0), there were absorption bands at  $3360\text{ cm}^{-1}$ ,  $2880\text{ cm}^{-1}$ ,  $1151\text{ cm}^{-1}$ ,  $1076\text{ cm}^{-1}$  and  $1035\text{ cm}^{-1}$ , which corresponded to the superposition peak of -OH and -NH<sub>2</sub> band, C-H stretching band, the bridge oxygen stretching band, and the C-O stretching bands<sup>1,2</sup>. The peaks which are located from  $1660\text{ cm}^{-1}$  to  $1500\text{ cm}^{-1}$  were formed by the co-contribution of the residual acetamide group bands<sup>1</sup> since the chitosan used here has an average degree of deacetylation of 85.5%. New peak at  $1731\text{ cm}^{-1}$  appeared after PTEGDMA was added and its intensity increases with the PTEGDMA content. This peak was attributed to the C=O stretching vibration of ester groups in PTEGDMA and confirms the successful introduction of PTEGDMA into CS/PEO membranes. It was also observed that the peak at  $1141\text{ cm}^{-1}$  (ascribed to C-O stretching bands) for pure PTEGDMA prepared by UV-curing TEGDMA cast film directly was shifted gradually to around  $1075\text{ cm}^{-1}$  in CS-PEO-PTEGDMA composite, which indicated the formation of complex involving hydrogen bonding among CS, PEO and PTEGDMA<sup>3-5</sup>.

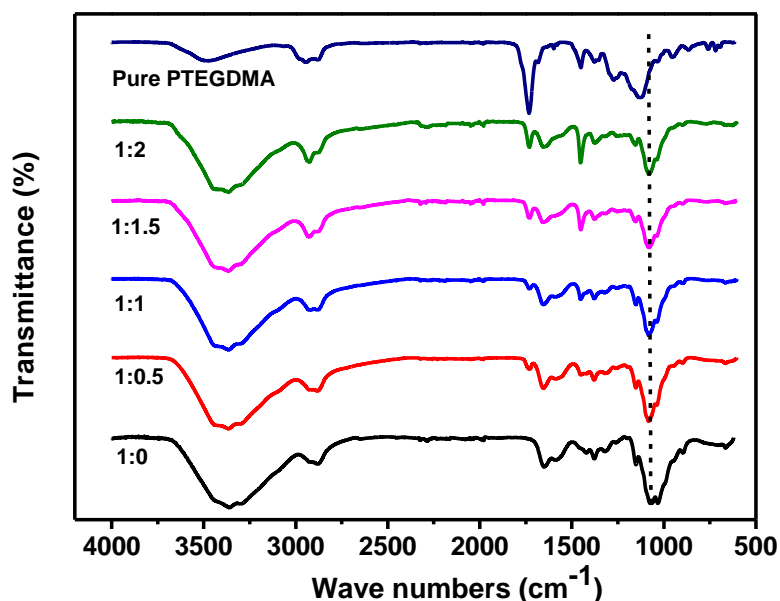

**Fig. S4.** The ATR-FTIR spectra of CS-PEO-PTEGDMA composite membranes with different CS/TEGDMA mass ratios.

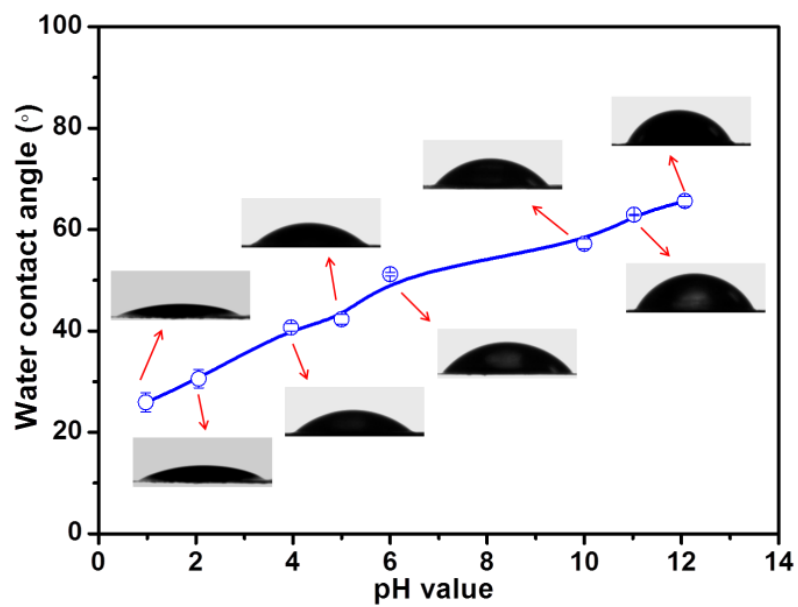

**Fig. S5.** The effect of initial solution pH of direct red 80 on the water contact angle of CS-PEO-PTEGDMA membranes

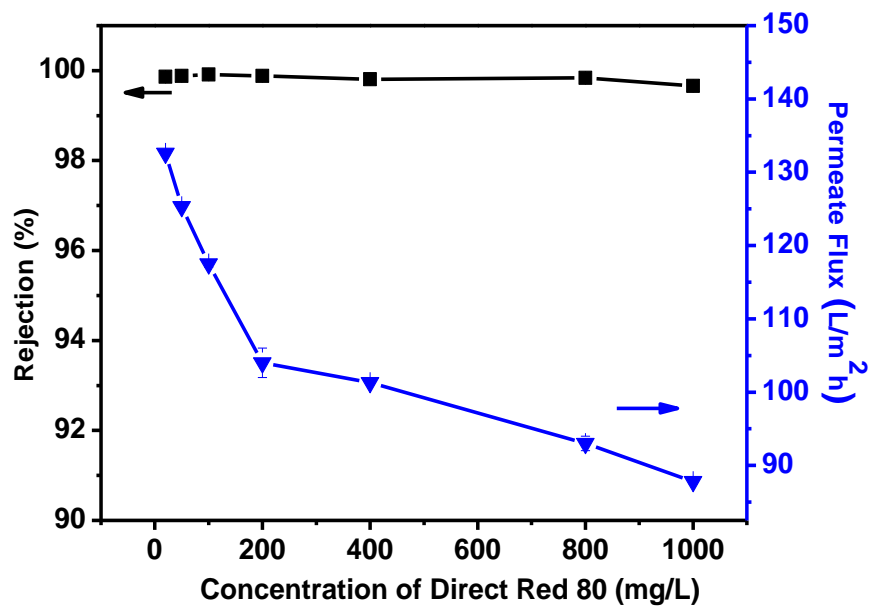

**Fig. S6.** The effect of dye concentration on the filtration performance of CS-PEO-PEGDMA TFNC membrane (20-25 °C, 0.2 MPa, pH= 6.0 ± 0.1).

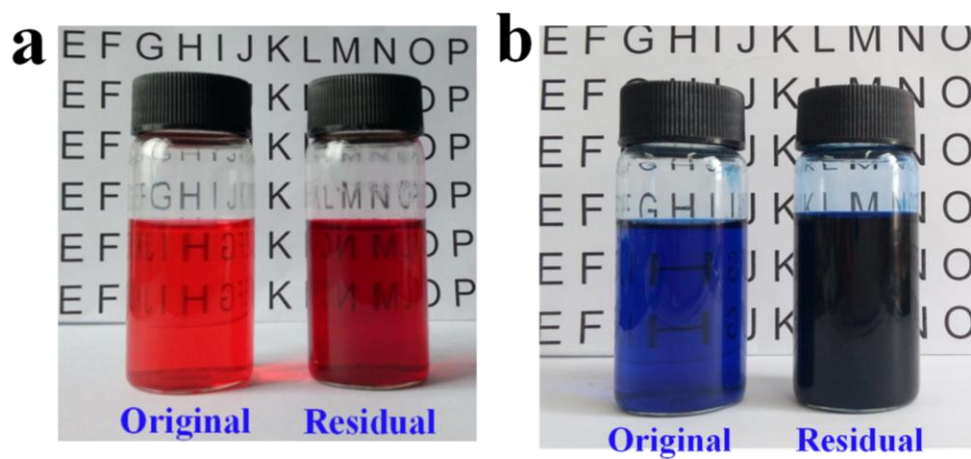

**Fig. S7.** Photographic images of the Direct Red 80 solution (a) and Acid Blue 90 solution (b) before (original) and after (residual) long-term filtration for 6 h.



## References

1. Z. G. Zhao, J. F. Zheng, M. J. Wang, H. Y. Zhang and C. C. Han, *J. Membr. Sci.*, 2012, 394, 209-217.
2. Y. L. Ji, Q. F. An, F. Y. Zaho and C. J. Gao, *Desalination*, 2015, 357, 8-15.
3. Y. Z. Zhang, B. Su, S. Ramakrishna and C. T. Lim, *Biomacromolecules*, 2008, 9, 136-141.
4. N. Bhattarai, J. Gunn and M. Q. Zhang, *Adv. Drug Delivery Rev.*, 2010, 62, 83-99.
5. J. Berger, M. Reist, J. M. Mayer, O. Felt and R. Gurny, *Eur. J. Pharm. Biopharm.*, 2004, 57, 35-52.
